# Supplementary material for: A New Tool for CRISPR-Cas13a-Based Cancer Gene Therapy
Source: PubMed Central journal article supplement — Mol Ther Oncolytics. 2020 Sep 16;19:79–92. doi: 10.1016/j.omto.2020.09.004 (PMC7554321; doi:10.1016/j.omto.2020.09.004), 2020-09-16
Supplement: mmc1.pdf [file mmc1.pdf]

**OMTO, Volume 19**

**Supplemental Information**

**A New Tool for CRISPR-Cas13a-Based  
Cancer Gene Therapy**

**Jinliang Gao, Tao Luo, Na Lin, Shuyan Zhang, and Jinke Wang**

## Supplementary Data

Table S1. Guide sequences of Cas13a for interference experiments.

| Name                | Guide sequence                                                                                                                                                                           | PFS |
|---------------------|------------------------------------------------------------------------------------------------------------------------------------------------------------------------------------------|-----|
| No transcript guide | TAGATTGCTGTTCTACCAAGTAATCCAT                                                                                                                                                             | N/A |
| EGFP guide          | CTGTTGTAGTTGTACTCCAGCTTGTGCC                                                                                                                                                             | C   |
| mCherry guide       | CCTCGAAGTTCATCACGCGCTCCCACTT                                                                                                                                                             | C   |
| hTERT guide         | CCCTCTTTTCTCTGCGGAACGTTCTGGC                                                                                                                                                             | C   |
| hEZH2 guide         | CGGCTTCTTTATCATCTCGGTGATCCT                                                                                                                                                              | C   |
| hRelA guide         | CCTCTTTCTGCACCTTGTCACACAGTAG                                                                                                                                                             | A   |
| mTERT guide         | ACACGGTCCTTCCCCGGGCTGCTGCGGA                                                                                                                                                             | C   |
| mEZH2 guide         | CCGTCCTTTTTCAGTTGTATCTTTCTGC                                                                                                                                                             | C   |
| mRelA guide         | GGAAAGATGAGGGGAAACAGATCGTCCA                                                                                                                                                             | C   |
| hTER guide          | CCCTCTTTTCTCTGCGGAACGTTCTGGCGAAACACCGATTTAGACTACCCC<br>AAAAACGAAGGGGACTAAAACCGGCTTTCTTTATCATCTCGGTGATCCTG<br>AAACACCGATTTAGACTACCCCAAAAACGAAGGGGACTAAAACCTCTTT<br>CTGCACCTTGTCACACAGTAG  |     |
| mTER guide          | ACACGGTCCTTCCCCGGGCTGCTGCGGAGAAACACCGATTTAGACTACCC<br>CAAAAACGAAGGGGACTAAAACCGTCCTTTTTTCAGTTGTATCTTTCTGCG<br>AAACACCGATTTAGACTACCCCAAAAACGAAGGGGACTAAAACGGAAAG<br>ATGAGGGGAAACAGATCGTCCA |     |

Note: h, human; m, mouse.

Table S2. Oligonucleotides used to construct pDCUg vectors.

| Name      | Sequence (5'→3')                                                                                                                                                                                                      |
|-----------|-----------------------------------------------------------------------------------------------------------------------------------------------------------------------------------------------------------------------|
| NT-F      | AGGAAGACTAAAACCTAGATTGCTGTTCTACCAAGTAATCCATTTTTGCGTCTTCGA                                                                                                                                                             |
| NT-R      | TCGAAGACGCAAAAATGGATTACTTGGTAGAACAGCAATCTAGTTTTAGTCTTCCT                                                                                                                                                              |
| EGFP-F    | AGGAAGACTAAAACCTGTTGTAGTTGTACTCCAGCTTGTGCCTTTTTCGCTCTTCGA                                                                                                                                                             |
| EGFP-R    | TCGAAGACGCAAAAAGGCACAAGCTGGAGTACAACAGGTTTTAGTCTTCCT                                                                                                                                                                   |
| mCherry-F | AGGAAGACTAAAACCTCGAAGTTCATCACGCGCTCCCACTTTTTTTCGCTCTTCGA                                                                                                                                                              |
| mCherry-R | TCGAAGACGCAAAAAAGTGGGAGCGCGTGATGAACTTCGAGGGTTTTAGTCTTCCT                                                                                                                                                              |
| hTERT-F   | AGGAAGACTAAAACCCCTCTTTTCTCTGCGGAACGTTCTGGCTTTTTCGCTCTTCGA                                                                                                                                                             |
| hTERT-R   | TCGAAGACGCAAAAAGCCAGAAGCTTCCGCAGAGAAAAGAGGGGTTTTAGTCTTCCT                                                                                                                                                             |
| hEZH2-F   | AGGAAGACTAAAACCGGCTTTCTTTATCATCTCGGTGATCCTTTTTTCGCTCTTCGA                                                                                                                                                             |
| hEZH2-R   | TCGAAGACGCAAAAAGGATCACCGAGATGATAAAGAAAGCCGGTTTTAGTCTTCCT                                                                                                                                                              |
| hRelA-F   | AGGAAGACTAAAACCTCTTTTCTGCACCTTGTACACAGTAGTTTTTCGCTCTTCGA                                                                                                                                                              |
| hRelA-R   | TCGAAGACGCAAAACTACTGTGTGACAAGGTGCAGAAAGAGGGTTTTAGTCTTCCT                                                                                                                                                              |
| mTERT-F   | AGGAAGACTAAAACACACGGTCTTCCCCGGGCTGCTGCGGA TTTTTCGCTCTTCGA                                                                                                                                                             |
| mTERT-R   | TCGAAGACGCAAAAATCCGCAGCAGCCCGGGGAAGGACCGTGTGTTTTAGTCTTCCT                                                                                                                                                             |
| mEZH2-F   | AGGAAGACTAAAACCGTCTTTTTTCAGTTGTATCTTTCTGC TTTTTCGCTCTTCGA                                                                                                                                                             |
| mEZH2-R   | TCGAAGACGCAAAAAGCAGAAAGATACTGAAAAAGGACGGGTTTTAGTCTTCCT                                                                                                                                                                |
| mRelA-F   | AGGAAGACTAAAACGGAAAGATGAGGGGAAACAGATCGTCCA TTTTTCGCTCTTCGA                                                                                                                                                            |
| mRelA-R   | TCGAAGACGCAAAAATGGACGATCTGTTTCCCCTCATCTTTCCGTTTTAGTCTTCCT                                                                                                                                                             |
| hTER      | AGGAAGACTAAAACCCCTCTTTTCTCTGCGGAACGTTCTGGCGAAACACCGATTTAGACTAC<br>CCCAAAAACGAAGGGGACTAAAACCGGCTTTCTTTATCATCTCGGTGATCCTGAAACACCGA<br>TTTTAGACTACCCAAAAACGAAGGGGACTAAAACCCCTCTTTCTGCACCTTGTACACAGTAG<br>TTTTTCGCTCTTCGA |
| mTER      | AGGAAGACTAAAACACACGGTCTTCCCCGGGCTGCTGCGGAGAAACACCGATTTAGACTA<br>CCCAAAAACGAAGGGGACTAAAACCGTCTTTTTTCAGTTGTATCTTTCTGCGAAACACCG<br>ATTTAGACTACCCAAAAACGAAGGGGACTAAAACGGAAAGATGAGGGGAAACAGATCGTC<br>CATTTTTCGCTCTTCGA     |

Note: double-stranded hTER and mTER were prepared by PCR amplification using the listed single-stranded oligonucleotides as templates. Note: h, human; m, mouse.

Table S3. Primers for qPCR detection.

| Name        | Primer sequence (5'-3') | Name        | Primer sequence (5'-3') |
|-------------|-------------------------|-------------|-------------------------|
| AAV-F       | TGCATGACCAGGCTCAGCTA    | AAV-R       | GACAGGGAAGGGAGCAGTG     |
| Cas13a-F    | GGAAAAGTACCAGTCCGCCA    | Cas13a-R    | GAAGTCCAGGAACCTGCCGA    |
| EGFP-F      | GACGGCAACTACAAGACCCG    | EGFP-R      | CTGCCGTCCTCGATGTTGT     |
| mCherry-F   | CGCGTGATGAACTTCGAGGA    | mCherry-R   | TCTGCTTGATCTCGCCCTTC    |
| hGAPDH-F    | ATTGGTTCGTATTGGGCG      | hGAPDH-R    | CTCGCTCCTGGAAGATGG      |
| hTERT-F     | GGCACGGCTTTTGTTCAGATG   | hTERT-R     | GCTGTTACCTGCAAATCCA     |
| hEZH2-F     | ACATGCGACTGAGACAGCTC    | hEZH2-R     | GTCACTGGTCACCGAACACT    |
| hRelA-F     | CCTGGAGCAGGCTATCAGTC    | hRelA-R     | ATGGGATGAGAAAGGACAGG    |
| mGAPDH-F    | TCACCACCATGGAGAAGGC     | mGAPDH-R    | GCTAAGCAGTTGGTGGTGCA    |
| mTERT-F     | TCTACCGCACTTTGGTTGCC    | mTERT-R     | CAGCACGTTTCTCTCGTTGC    |
| mEZH2-F     | CGAATAACAGTAGCAGACCCAG  | mEZH2-R     | TGTTTGACACCGAGAATTTGCTT |
| mRelA-F     | TGCGATTCCGCTATAAATGCG   | mRelA-R     | ACAAGTTCATGTGGATGAGGC   |
| mCD31-F     | ACCGGGTGCTGTTCTATAAGG   | mCD31-R     | TCACCTCGTACTCAATCGTGG   |
| mMKi67-F    | CAAGGCGAGCCTCAAGAGATA   | mMKi67-R    | TGTGCTGTTCTACATGCCCTG   |
| mCaspase3-F | CTGACTGGAAAGCCGAAACTC   | mCaspase3-R | CGACCCGTCCTTTGAATTTCT   |

Note: h, human; m, mouse.

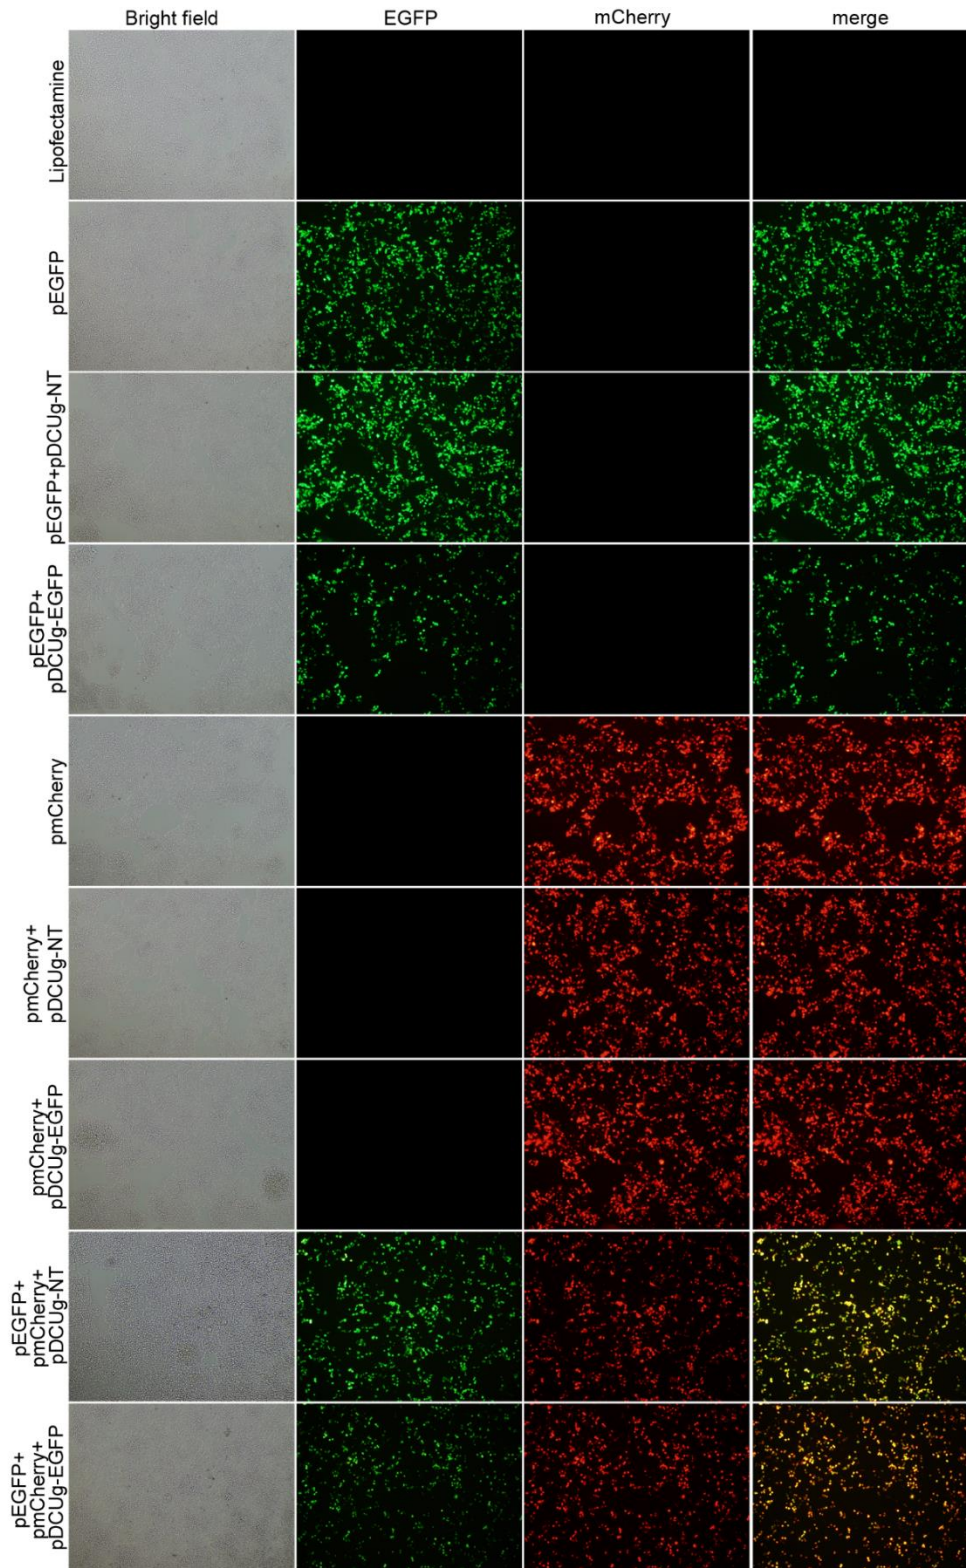

Fig.S1. Interference of ectopic EGFP/mCherry expression with DMP-Cas13a/U6-EGFP in HEK293T cells. Cells were transfected by various plasmid vectors and imaged with fluorescence microscope at 24 h post transfection. pEGFP/mCherry, plasmid expressing EGFP/mCherry under the control of CMV promoter; pDCUg-NT/EGFP, plasmid expressing DMP-controlled Cas13a and U6-controlled gRNA targeting no transcript (NT) or EGFP transcript. This figure shows the representative images of cells of three independent transfection.

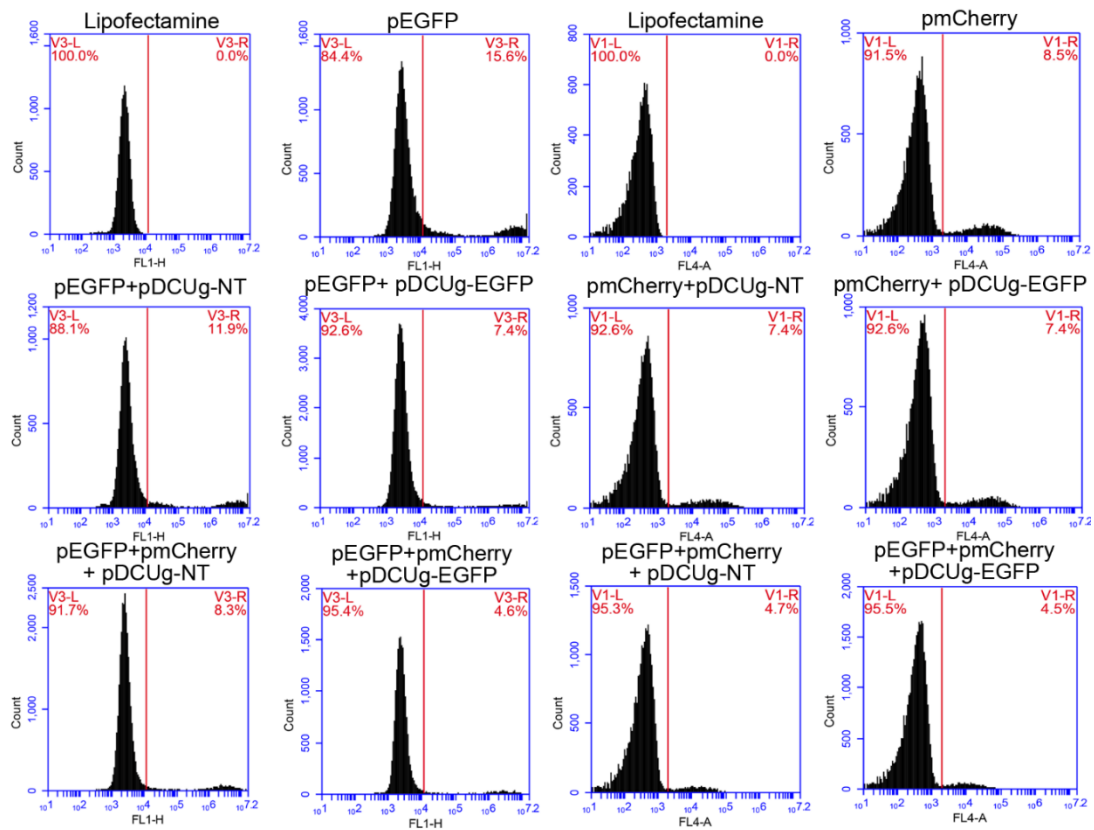

Fig.S2. Interference of ectopic EGFP/mCherry expression with DMP-Cas13a/U6-EGFP in HEK293T cells. Cells were transfected by various plasmid vectors and the fluorescence intensity of cells were quantified with flow cytometry (FC) at 24 h post transfection. The channel FL1 shows the green fluorescence and FL4 the red fluorescence. pEGFP/mCherry, plasmid expressing EGFP/mCherry under the control of CMV promoter; pDCUg-NT/EGFP, plasmid expressing DMP-controlled Cas13a and U6-controlled gRNA targeting no transcript (NT) or EGFP transcript. This figure shows the representative FC results of three independent transfection.

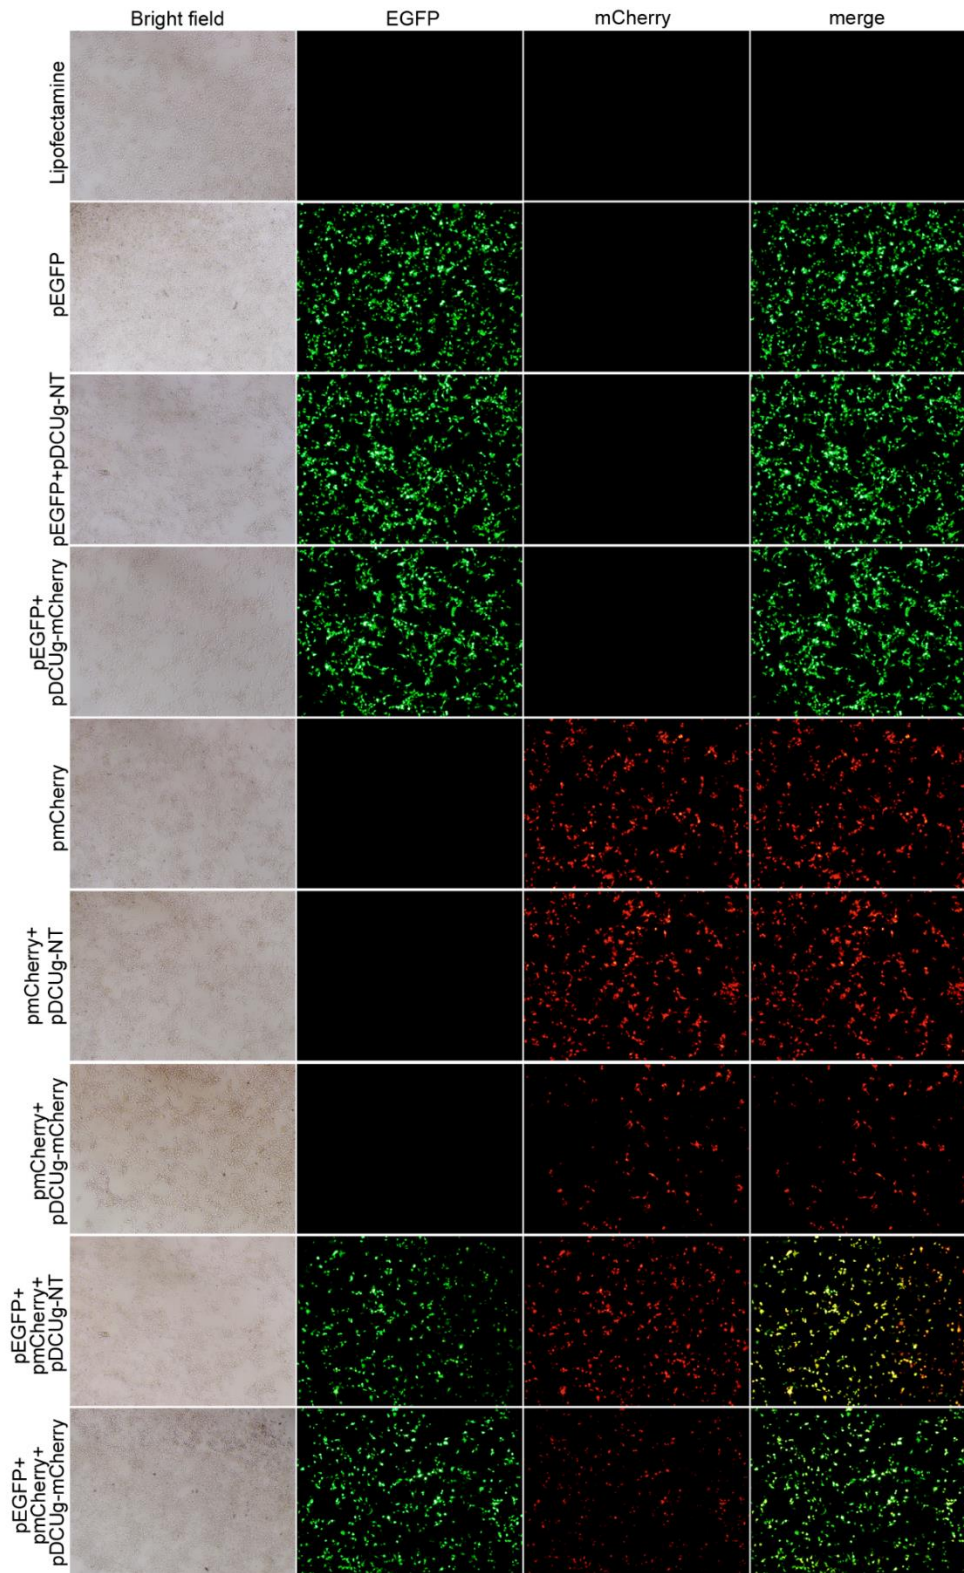

Fig.S3. Interference of ectopic EGFP/mCherry expression with DMP-Cas13a/U6-mCherry in HEK293T cells. Cells were transfected by various plasmid vectors and imaged with fluorescence microscope at 24 h post transfection. pEGFP/mCherry, plasmid expressing EGFP/mCherry; pDCUg-NT/mCherry, plasmid expressing DMP-controlled Cas13a and U6-controlled gRNA targeting no transcript (NT) or mCherry transcript. This figure shows the representative images of cells of three independent transfection.

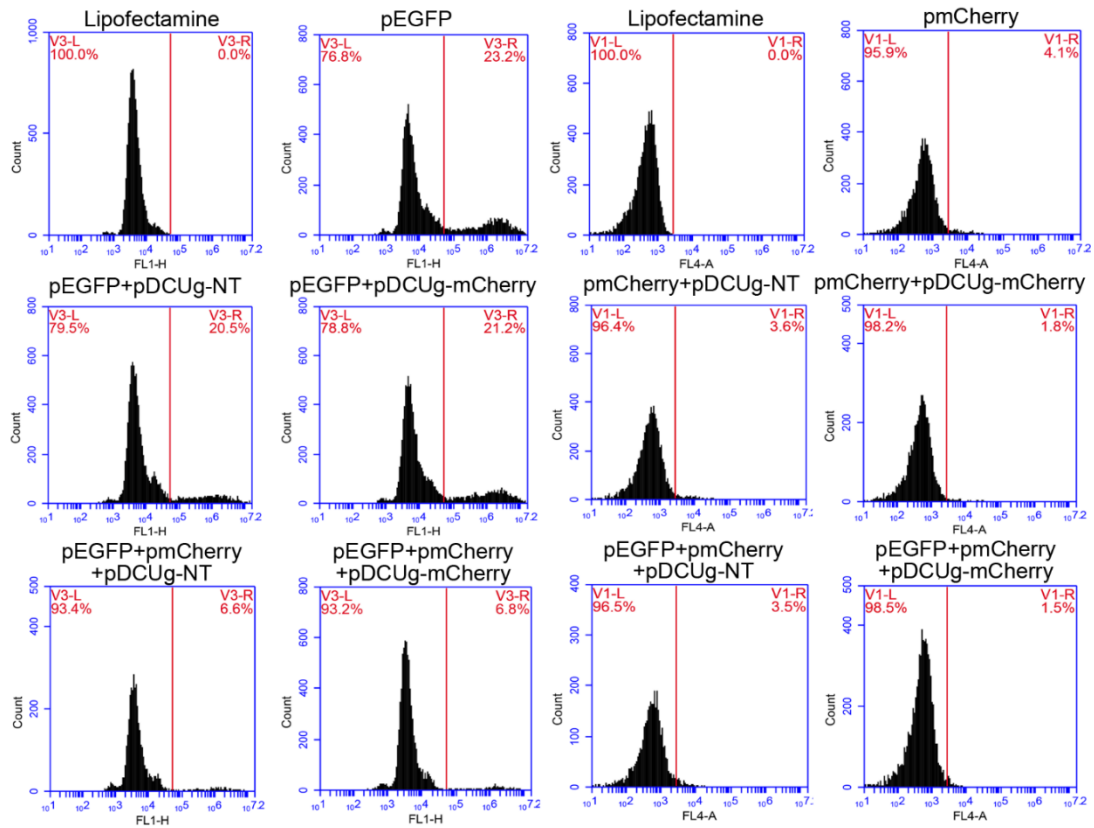

Fig.S4. Interference of ectopic EGFP/mCherry expression with DMP-Cas13a/U6-mCherry in HEK293T cells. Cells were transfected by various plasmid vectors and the fluorescence intensity of cells were quantified with flow cytometry (FC) at 24 h post transfection. The channel FL1 shows the green fluorescence and FL4 the red fluorescence. pEGFP/mCherry, plasmid expressing EGFP/mCherry under the control of CMV promoter; pDCUg-NT/mCherry, plasmid expressing DMP-controlled Cas13a and U6-controlled gRNA targeting no transcript (NT) or mCherry transcript. This figure shows the representative FC results of three independent transfection.



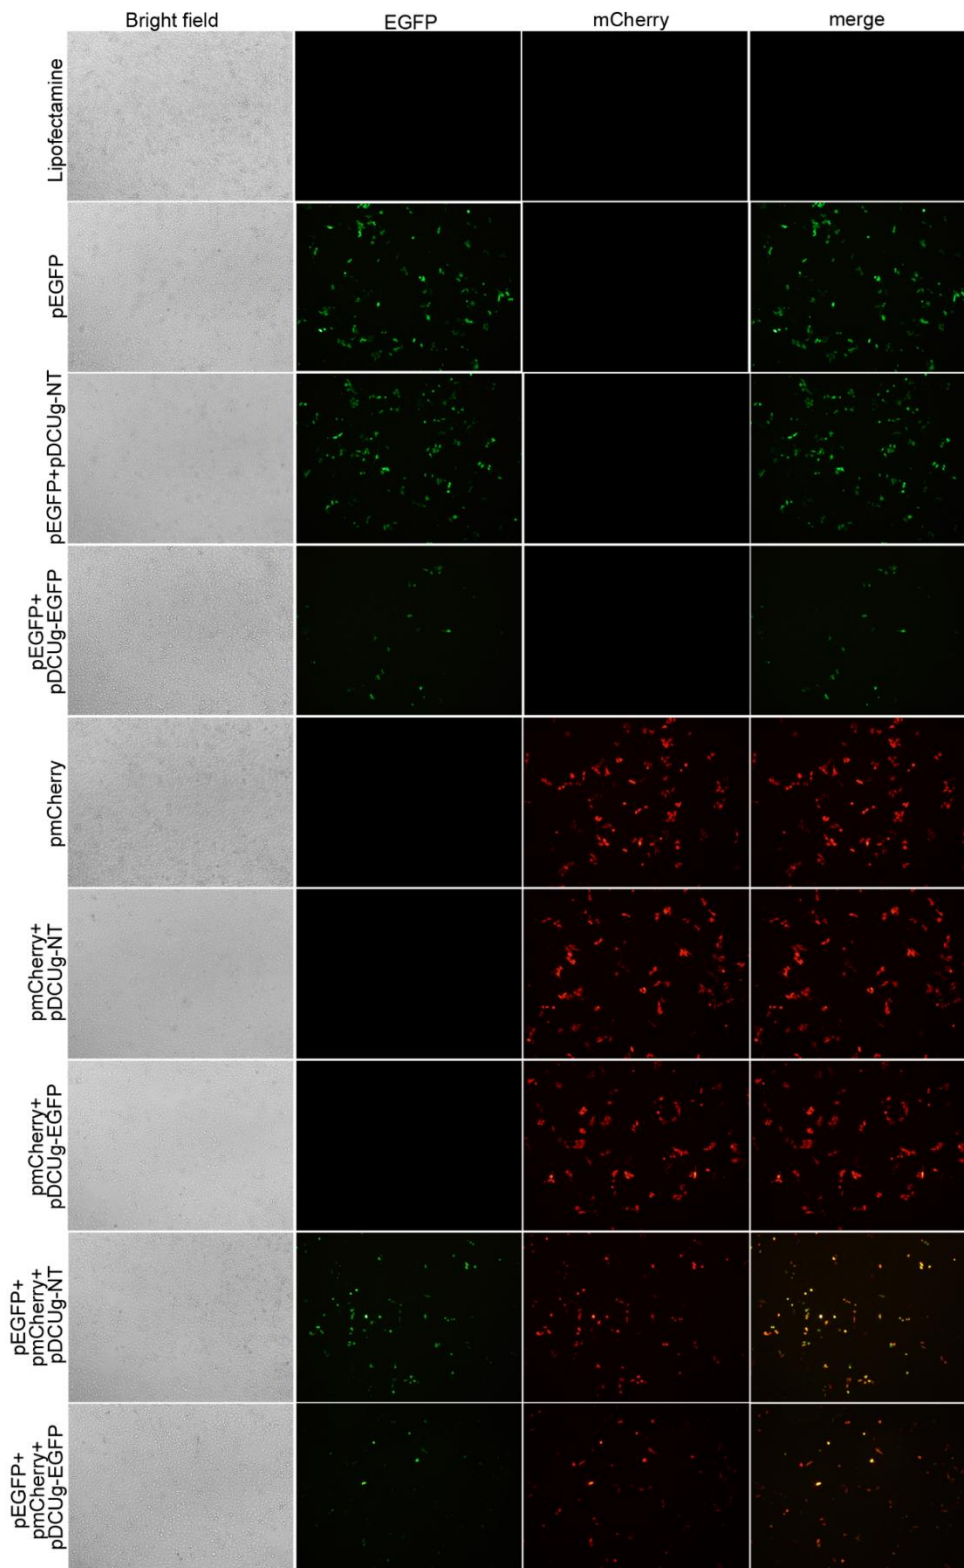

Fig.S5. Interference of ectopic EGFP/mCherry expression with DMP-Cas13a/U6-EGFP in HepG2 cells. Cells were transfected by various plasmid vectors and imaged with fluorescence microscope at 24 h post transfection. pEGFP/mCherry, plasmid expressing EGFP/mCherry under the control of CMV promoter; pDCUg-NT/EGFP, plasmid expressing DMP-controlled Cas13a and U6-controlled gRNA targeting no transcript (NT) or EGFP transcript. This figure shows the representative images of cells of three independent transfection.

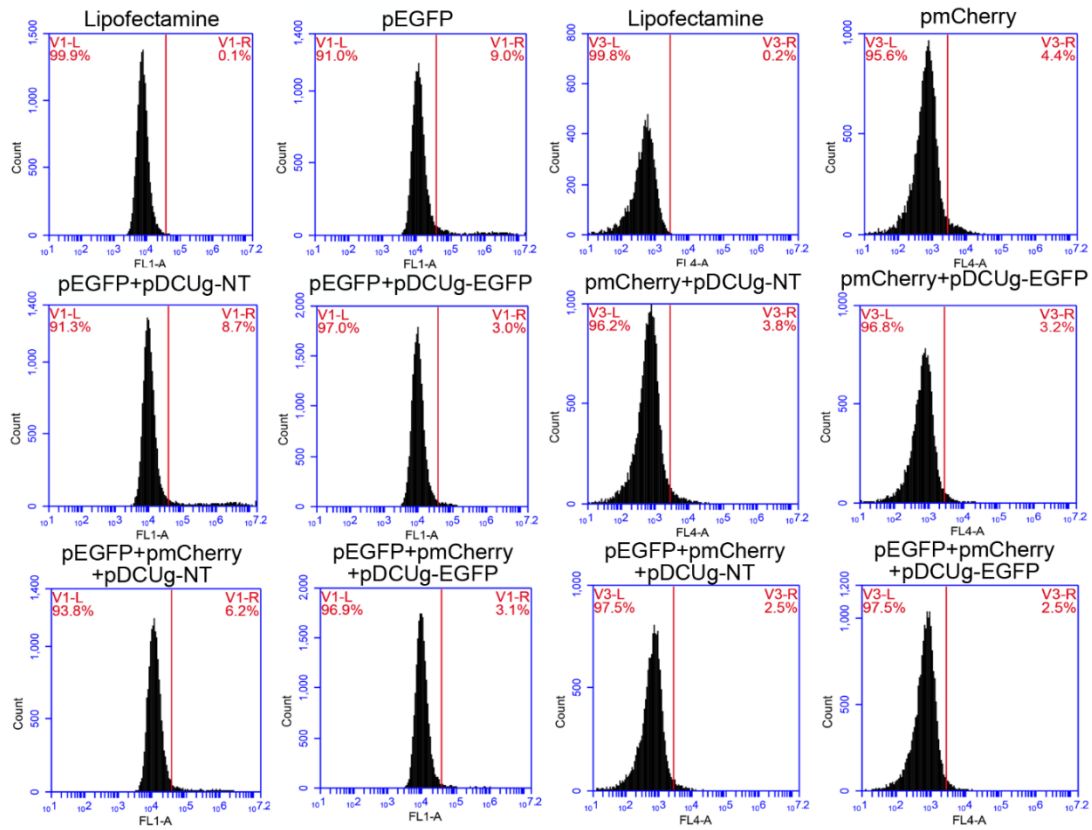

Fig.S6. Interference of ectopic EGFP/mCherry expression with DMP-Cas13a/U6-EGFP in HepG2 cells. Cells were transfected by various plasmid vectors and the fluorescence intensity of cells were quantified with flow cytometry (FC) at 24 h post transfection. The channel FL1 shows the green fluorescence and FL4 the red fluorescence. pEGFP/mCherry, plasmid expressing EGFP/mCherry under the control of CMV promoter; pDCUg-NT/EGFP, plasmid expressing DMP-controlled Cas13a and U6-controlled gRNA targeting no transcript (NT) or EGFP transcript. This figure shows the representative FC results of three independent transfection.

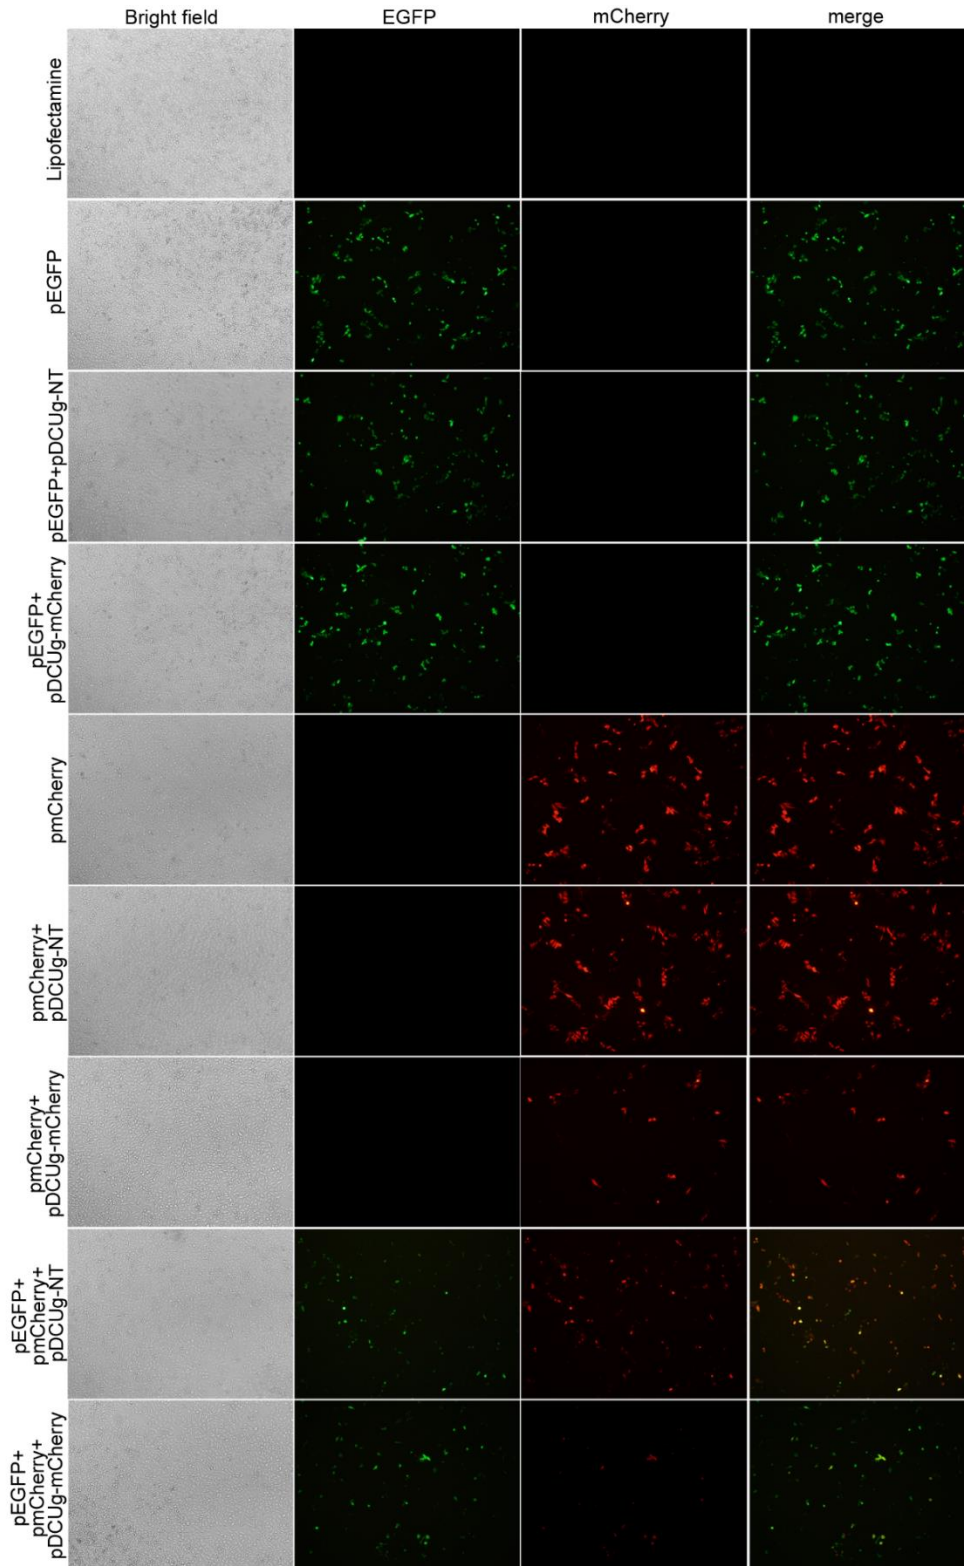

Fig.S7. Interference of ectopic EGFP/mCherry expression with DMP-Cas13a/U6-mCherry in HepG2 cells. Cells were transfected by various plasmid vectors and imaged with fluorescence microscope at 24 h post transfection. pEGFP/mCherry, plasmid expressing EGFP/mCherry under the control of CMV promoter; pDCUg-NT/mCherry, plasmid expressing DMP-controlled Cas13a and U6-controlled gRNA targeting no transcript (NT) or mCherry transcript. This figure shows the representative images of cells of three independent transfection.

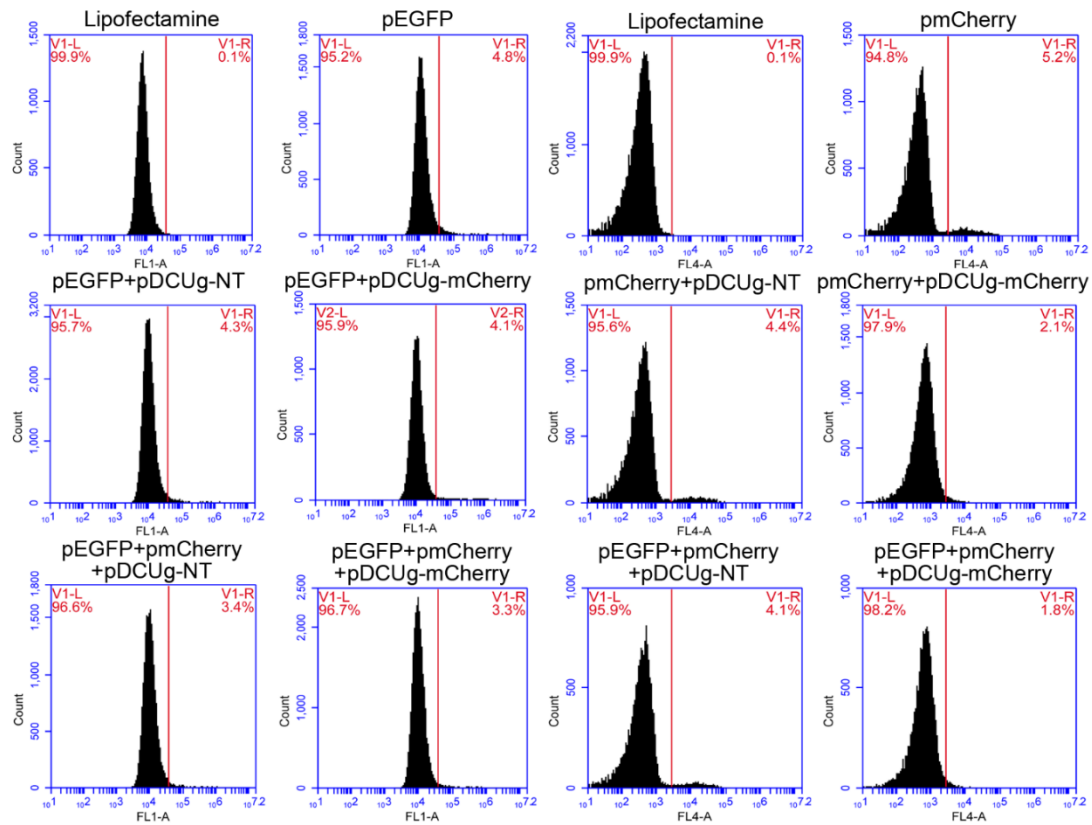

Fig.S8. Interference of ectopic EGFP/mCherry expression with DMP-Cas13a/U6-mCherry in HepG2 cells. Cells were transfected by various plasmid vectors and the fluorescence intensity of cells were quantified with flow cytometry (FC) at 24 h post transfection. The channel FL1 shows the green fluorescence and FL4 the red fluorescence. pEGFP/mCherry, plasmid expressing EGFP/mCherry under the control of CMV promoter; pDCUg-NT/mCherry, plasmid expressing DMP-controlled Cas13a and U6-controlled gRNA targeting no transcript (NT) or mCherry transcript. This figure shows the representative FC results of three independent transfection.

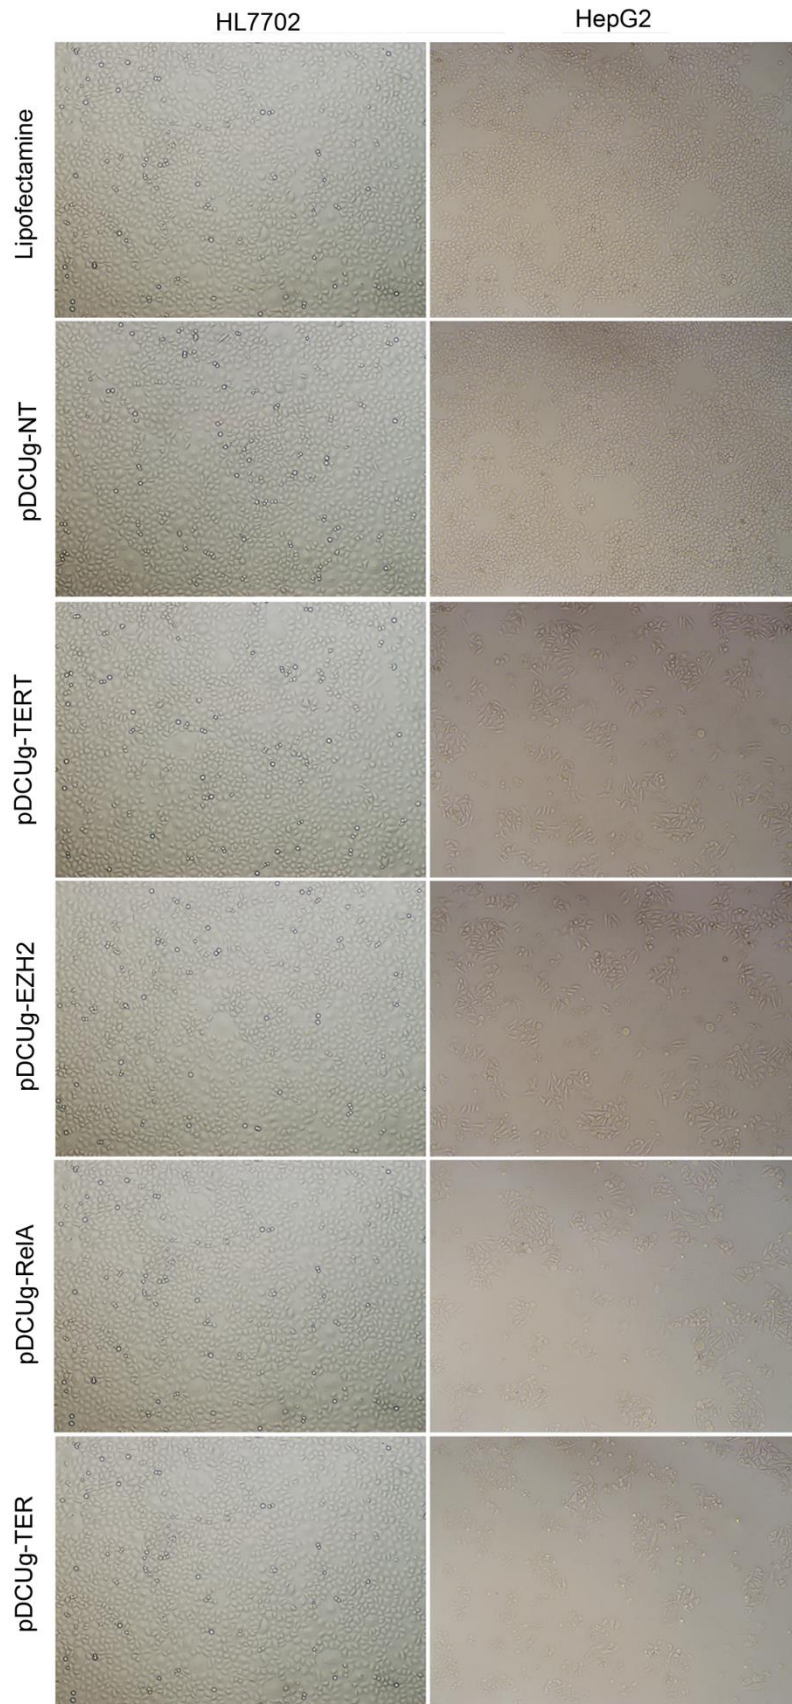

Fig.S9. Interference of endogenous gene expression with DMP-Cas13a/U6-gRNA. Cells were transfected by various vectors and detected at 24 h post transfection. Representative images of cells.

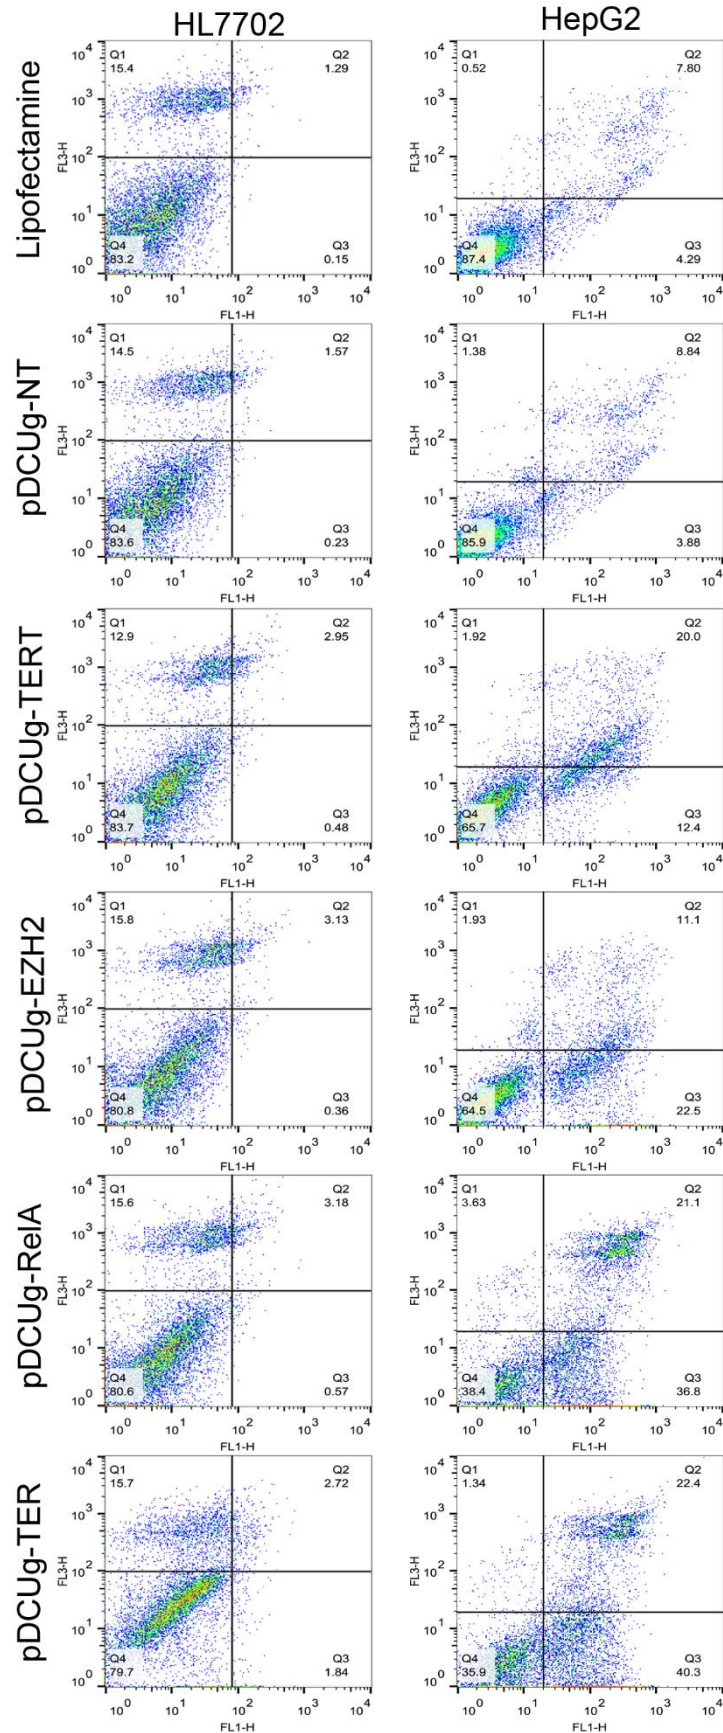

Fig.S10. Interference of endogenous gene expression with DMP-Cas13a/U6-gRNA. Cells were transfected by various vectors and detected at 24 h post transfection. Flow cytometry analysis of cell apoptosis.

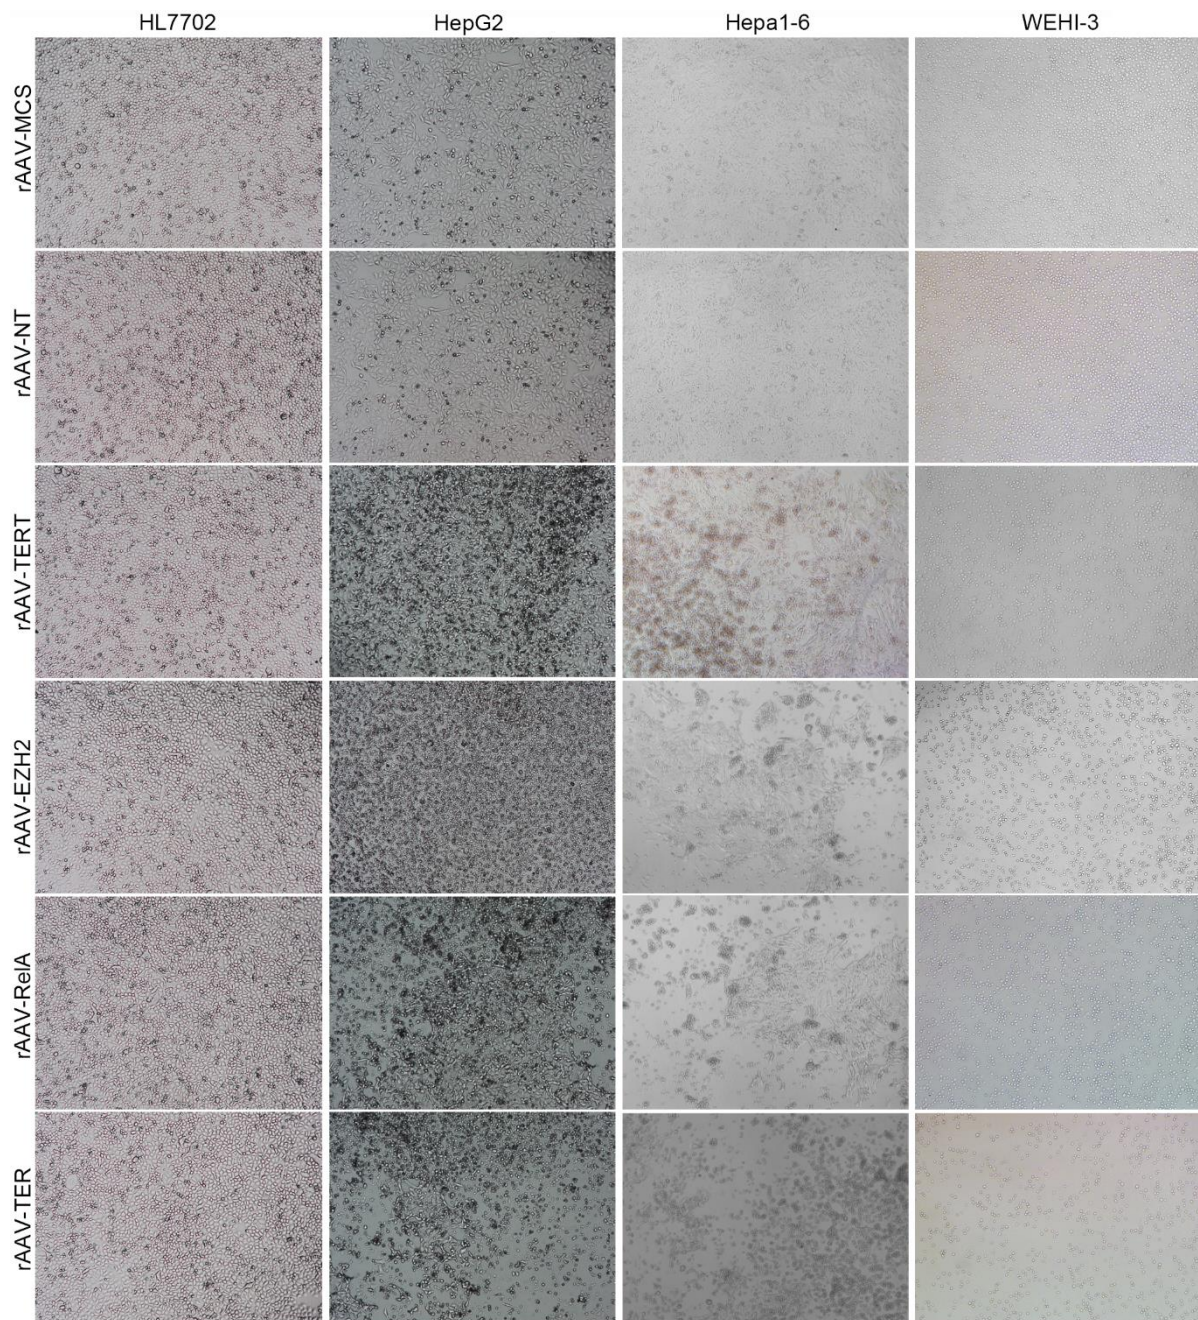

Fig.S11. Antitumor effects of DMP-Cas13a/U6-gRNA virus in vitro. Cells were inoculated in 24-well plate ( $1 \times 10^5$  cells/well) and cultured for 12 h. Cells were then treated with viruses ( $5 \times 10^{10}$  vg/well) including rAAV-MCS, rAAV-NT, rAAV-TERT, rAAV-EZH2, rAAV-RelA, and rAAV-TER, respectively. Cells were cultured for 72 h and imaged at 24 h post transfection.

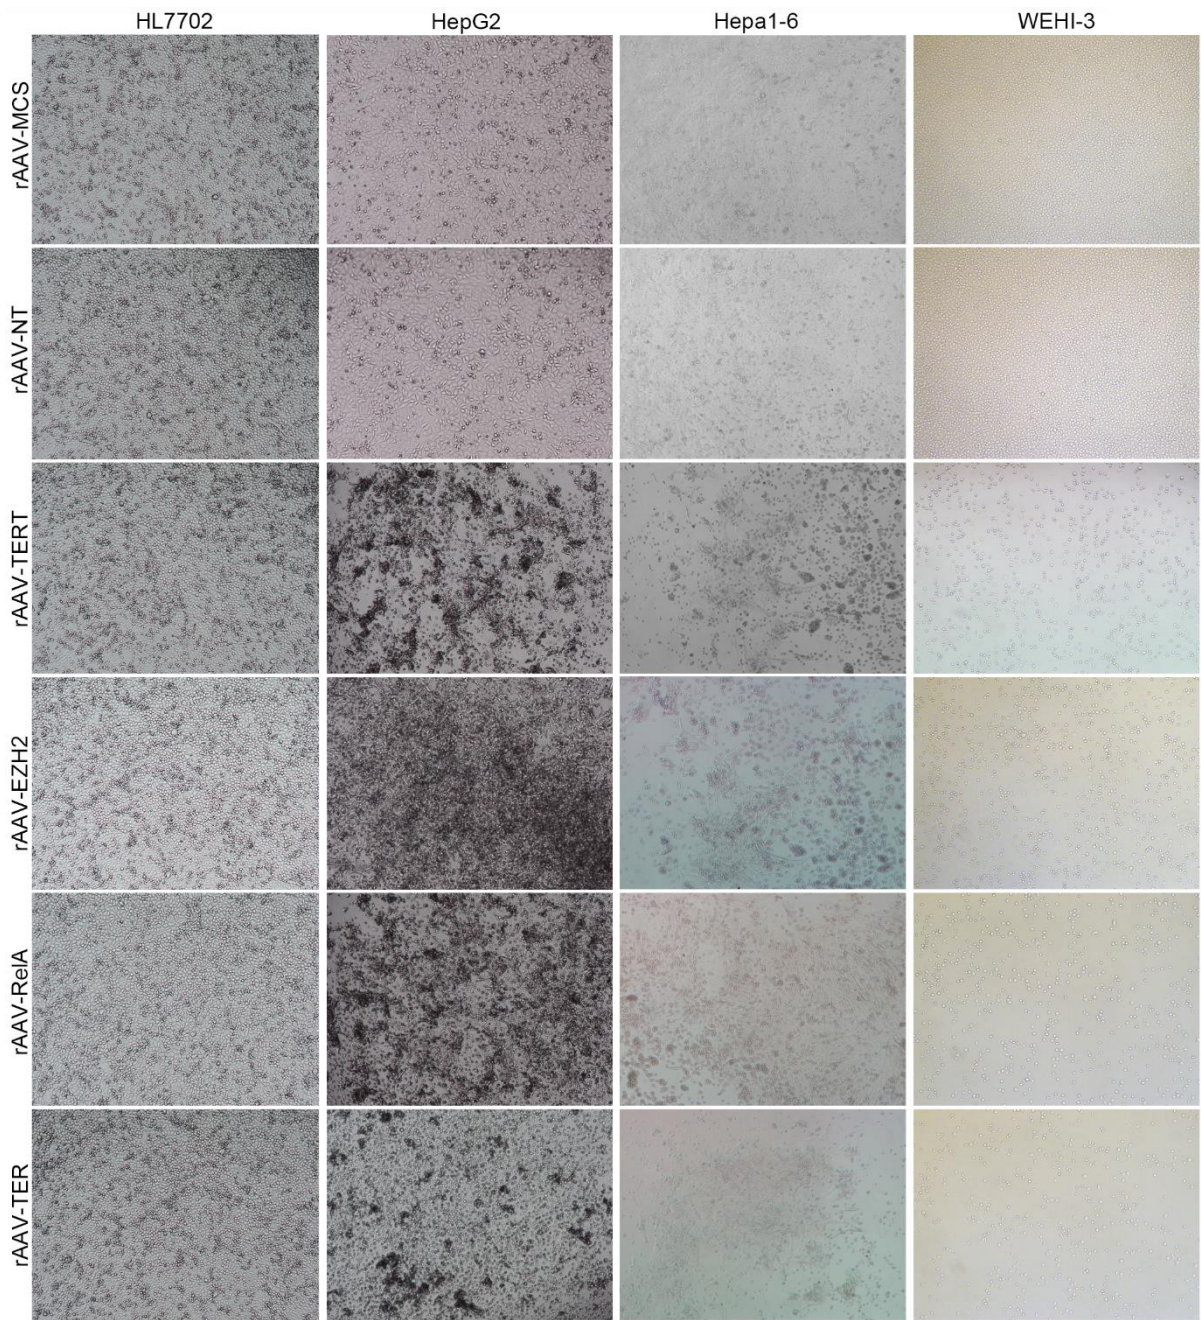

Fig.S12. Antitumor effects of DMP-Cas13a/U6-gRNA virus in vitro. Cells were inoculated in 24-well plate ( $1 \times 10^5$  cells/well) and cultured for 12 h. Cells were then treated with viruses ( $5 \times 10^{10}$  vg/well) including rAAV-MCS, rAAV-NT, rAAV-TERT, rAAV-EZH2, rAAV-RelA, and rAAV-TER, respectively. Cells were cultured for 72 h and imaged at 48 h post transfection.



## Plasmids and the functional sequences

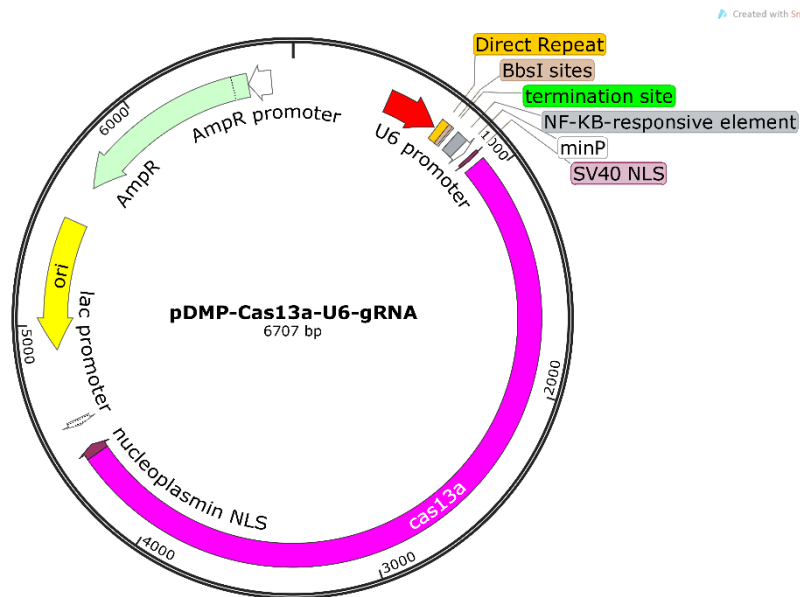

pDMP-Cas13a-U6-gRNA

U6+Direct repeat+Spacer+DMP+Cas13a+SV40 poly(A) signal

GAGGGCCTATTTCCCATGATTCCTTCATATTTGCATATACGATACAAGGCTGTTAGAGAGATAATT  
 GGAATTAATTTGACTGTAAACACAAAGATATTAGTACAAAATACGTGACGTAGAAAGTAATAAT  
 TTCTGGGTAGTTTGCAGTTTTAAAATTATGTTTTAAAATGGACTATCATATGCTTACCGTAACTT  
 GAAAGTATTTGATTTCTTGGCTTTATATATCTTGTGGAAAGGACGAAACACCGATTTAGACTAC  
 CCCAAAACGAAGGGGACTAAAACGGGTCTTCGAGAAGACCTGGATCCGGCCTAACTGGCCG  
 GTACCGGGAATTTCCGGGGACTTTCCGGGAATTTCCGGGGACTTTCCGGGAATTTCTAGAGG  
 GTATATAATGGAAGCTCGACTTCCAGGTCGACGCGTAAGCTTGCCACCATGCCAAAGAAGAAG  
 CGGAAGTCCGGTATCCACGGAGTCCACGACCCATGAAAGTGACCAAGGTCCGACGGCATCAG  
 CCACAAGAAGTACATCGAAGAGGGCAAGCTCGTGAAGTCCACCAGCGAGGAAAACCGGACC  
 AGCGAGAGACTGAGCGAGCTGCTGAGCATCCGGCTGGACATCTACATCAAGAACCCCGACAA  
 CGCTCCGAGGAAGAGAACCGGATCAGAAGAGAGAACCTGAAGAAGTTCTTTAGCAACAAGG  
 TGCTGCACCTGAAGGACAGCGTGCTGTATCTGAAGAACCGGAAAGAAAAGAACGCCGTGCAG  
 GACAAGA ACTATAGCGAAGAGGACATCAGCGAGTACGACCTGAAAAACAAGAACAGCTTCTC  
 CGTGCTGAAGAAGATCCTGCTGAACGAGGACGTGAACTCTGAGGAACTGGAATCTTTCCGA  
 AGGACGTGGAAGCCAAGCTGAACAAGATCAACAGCCTGAAGTACAGCTTCGAAGAGAA CAA  
 GGCCAACTACCAGAAGATCAACGAGAACAACGTGGAAAAAGTGGGCGCAAGAGCAAGCGG  
 AACATCATCTACGACTACTACAGAGAGAGCGCAAGCGCAACGACTACATCAACAACGTGCAG  
 GAAGCCTTCGACAAGCTGTATAAGAAAGAGGATATCGAGAACTGTTTTCTGATCGAGAAC  
 AGCAAGAAGCAGAGAAGTACAAGATCCGCGAGTACTATCAAGATCATCGGCCGGAAGAA  
 CGACAAAGAGAACTTCGCCAAGATTATCTACGAAGAGATCCAGAACGTGAACAACATCAAAG  
 AGCTGATTGAGAAGATCCCCGACATGTCTGAGCTGAAGAAAAGCCAGGTGTTCTACAAGTACT  
 ACCTGGACAAAGAGGAACTGAACGACAAGAATATTAAGTACGCCTTCTGCCACTTCGTGGAAA  
 TCGAGATGTCCAGCTGCTGAAAACTACGTGTACAAGCGGCTGAGCAACATCAGCAACGATA  
 AGATCAAGCGGATCTTCGAGTACCAGAATCTGAAAAAGCTGATCGAAAACAACTGCTGAAC  
 AAGCTGGACACCTACGTGCGGAACTGCGGCAAGTACAAC TACTATCTGCAAGTGGGCGAGATC  
 GCCACCTCCGACTTTATCGCCCGGAACCGGCAGAACGAGGCCTTCTGAGAAACATCATCGGC

GTGTCCAGCGTGGCCTACTTCAGCCTGAGGAACATCCTGGAAACCGAGAACGAGAACGGTATC  
ACCGGCCGGATGCGGGGCAAGACCGTGAAGAACAACAAGGGCGAAGAGAAATACGTGTCCG  
GCGAGGTGGACAAGATCTACAATGAGAACAAGCAGAACGAAGTGAAAGAAAATCTGAAGATG  
TTCTACAGCTACGACTTCAACATGGACAACAAGAACGAGATCGAGGACTTCTTCGCCAACATC  
GACGAGGCCATCAGCAGCATCAGACACGGCATCGTGCCTTCAACCTGGAAGTGGAAAGGCAA  
GGACATCTTCGCCTTCAAGAATATCGCCCCAGCGAGATCTCCAAGAAGATGTTTCAGAACGA  
AATCAACGAAAAGAAGCTGAAGCTGAAAATCTTCAAGCAGCTGAACAGCGCCAACGTGTTCA  
ACTACTACGAGAAGGATGTGATCATCAAGTACCTGAAGAATACCAAGTTCAACTTCGTGAACA  
AAAACATCCCCTTCGTGCCAGCTTACCAAGCTGTACAACAAGATTGAGGACCTGCGGAATA  
CCCTGAAGTTTTTTTGGAGCGTGCCCAAGGACAAAGAAGAGAAGGACGCCAGATCTACCTG  
CTGAAGAATATCTACTACGGCGAGTTCCTGAACAAGTTCGTGAAAACTCCAAGGTGTTCTTTA  
AGATCACCAATGAAGTGATCAAGATTAACAAGCAGCGGAACCAGAAAACCGGCCACTACAAG  
TATCAGAAGTTCGAGAACATCGAGAAAACCGTGCCCGTGAATACCTGGCCATCATCCAGAGC  
AGAGAGATGATCAACAACCAGGACAAAGAGGAAAAGAATACCTACATCGACTTTATTTCAGCAG  
ATTTTCCTGAAGGGCTTCATCGACTACCTGAACAAGAACAATCTGAAGTATATCGAGAGCAAC  
AACACAATGACAACAACGACATCTTCTCCAAGATCAAGATCAAAAAGGATAACAAAGAGAA  
GTACGACAAGATCCTGAAGAACTATGAGAAGCACAATCGGAACAAAGAAATCCCTCACGAGA  
TCAATGAGTTCGTGCGGAGATCAAGCTGGGGAAGATTCTGAAGTACACCGAGAATCTGAACA  
TGTTTTACCTGATCCTGAAGCTGCTGAACCACAAAGAGCTGACCAACCTGAAGGGCAGCCTGG  
AAAAGTACCAGTCCGCCAACAAAGAAGAAACCTTCAGCGACGAGTTGGAAGTATCAACCTG  
CTGAACCTGGACAACAACAGAGTGACCGAGGACTTCGAGCTGGAAGCCAACGAGATCGGCA  
AGTTCCTGGACTTCAACGAAAACAAAATCAAGGACCGGAAAGAGCTGAAAAAGTTCGACACC  
AACAGATCTATTTTCGACGGCGAGAACATCATCAAGCACCGGGCCTTCTACAATATCAAGAAAT  
ACGGCATGCTGAATCTGCTGAAAAGATCGCCGATAAGGCCAAGTATAAGATCAGCCTGAAAG  
AACTGAAAGAGTACAGCAACAAGAAGAATGAGATTGAAAAGAACTACACCATGCAGCAGAAC  
CTGCACCGGAAGTACGCCAGACCCAAGAAGGACGAAAAGTTCAACGACGAGGACTACAAAG  
AGTATGAGAAGGCCATCGGCAACATCCAGAAGTACACCCACCTGAAGAACAAGGTGGAATTC  
AATGAGCTGAACCTGCTGCAGGGCCTGCTGCTGAAGATCCTGCACCGGCTCGTGGGCTACACC  
AGCATCTGGGAGCGGGACCTGAGATTCCGGCTGAAGGGCGAGTTTCCCAGAACCACTACATC  
GAGGAAATTTTCAATTTTCGACAACCTCCAAGAATGTGAAGTACAAAAGCGGCCAGATCGTGAA  
AAGTATATCAACTTCTACAAAGAACTGTACAAGGACAATGTGGAAAAGCGGAGCATCTACTCC  
GACAAGAAAGTGAAGAACTGAAGCAGGAAAAAAAGGACCTGTACATCCGGAACCTACATTGC  
CCACTTCAACTACATCCCCACGCCGAGATTAGCCTGCTGGAAGTGCTGGAACCTGCGGAA  
GCTGCTGTCCTACGACCGGAAGCTGAAGAACGCCATCATGAAGTCCATCGTGGAACATTCTGAA  
AGAATACGGCTTCGTGGCCACCTTCAAGATCGGCGCTGACAAGAAGATCGAAATCCAGACCCT  
GGAATCAGAGAAGATCGTGACCTGAAGAATCTGAAGAAAAAGAACTGATGACCGACCGGA  
ACAGCGAGGAACTGTGCGAACTCGTGAAAGTCATGTTTCGAGTACAAGGCCCTGGAAAAAAGG  
CCGGCGGCCACGAAAAAGGCCGGCCAGGCAAAAAAGAAAAAGTGACTCGAGCACGTGCTAC  
GAGATTTTCGATTCCACCGCCGCCTTCTATGAAAGGTTGGGCTTCGGAATCGTTTTCCGGGACGC  
CGGCTGGATGATCCTCCAGCGCGGGGATCTCATGCTGGAGTTCCTTCGCCACCCC**A**ACT**TGTTT**  
**ATTGCAGCTTATAATGGTTACAAATAAAGCAATAGCATCACAAATTTACAAATAAAGCATT**  
**TTCACTGCATTCTAGTTGTGGTTTGTCCAACTCATCAATGTATCTTA**

The spacer sequence in above skeleton vector can be replaced by the following sequences for constructing pDMP-Cas13a-U6-gRNAs targeting particular genes:

No transcript (NT): TAGATTGCTGTTCTACCAAGTAATCCAT  
hTERT: CCCTCTTTTCTCTGCGGAACGTTCTGGC  
hEZH2: CGGCTTTCTTTATCATCTCGGTGATCCT  
hRelA: CCTCTTTCTGCACCTTGTCACACAGTAG  
hTER:CCCTCTTTTCTCTGCGGAACGTTCTGGCGAAACACCGATTTAGACTACCCCAAAAACGA  
AGGGGACTAAAACCGGCTTTCTTTATCATCTCGGTGATCCTGAAACACCGATTTAGACTACCC  
AAAAACGAAGGGGACTAAAACCTCTTTCTGCACCTTGTCACACAGTAG

mTERT: ACACGGTCCTTCCCCGGGCTGCTGCGGA  
mEZH2: CCGTCCTTTTTCAGTTGTATCTTTCTGC  
mRelA: GGAAAGATGAGGGGAAACAGATCGTCCA  
mTER:AGGAAGACTAAAACACACGGTCCTTCCCCGGGCTGCTGCGGAGAAACACCGATTTAGA  
CTACCCCAAAAACGAAGGGGACTAAAACCCGTCCTTTTTCAGTTGTATCTTTCTGCGAAACAC  
CGATTTAGACTACCCCAAAAACGAAGGGGACTAAAACGGAAAGATGAGGGGAAACAGATCGT  
CCATTTGCGTCTTCGA
